# Supplementary material for: A practical approach for incorporating dependence among fields in probabilistic record linkage
Source: Springer Nature journal article supplement (doi:10.1186/1472-6947-13-97), 2013-08-30

### Conditional Independence (Model 0)

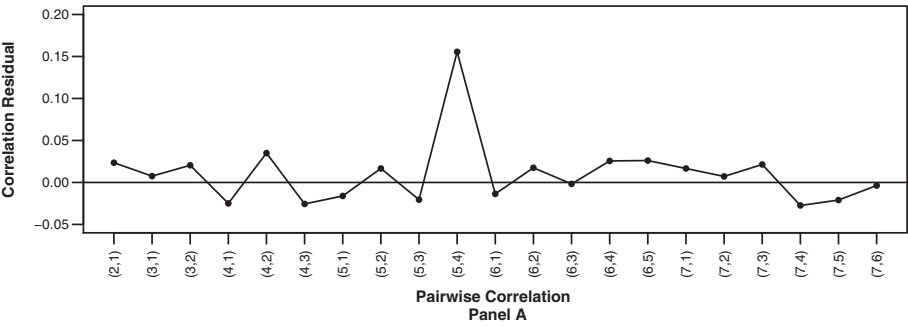

### Model I

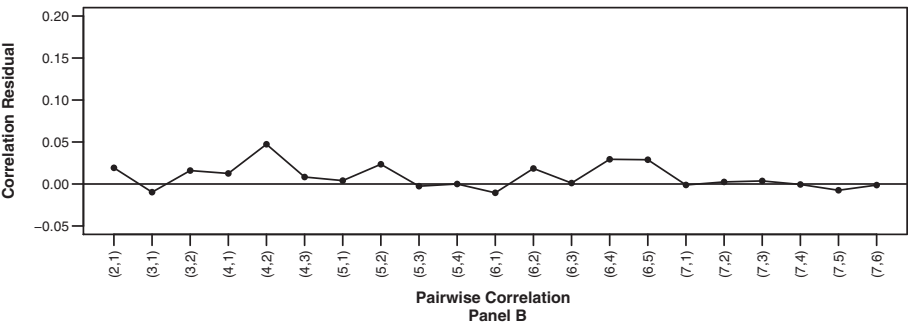

### Model II

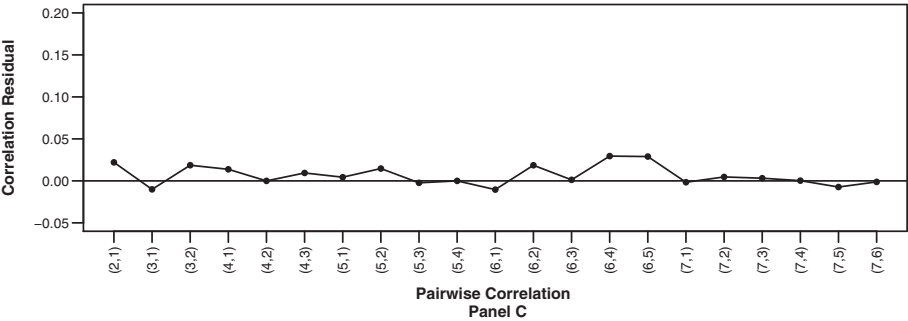

Supplement: 12911_2012_714_MOESM4_ESM.pdf [file 12911_2012_714_MOESM4_ESM.pdf]
